# Supplementary material for: Using the validated Reflective Functioning Questionnaire to investigate mentalizing in individuals presenting with eating disorders with and without self-harm
Source: PeerJ. 2018 Oct 29;6:e5756. doi: 10.7717/peerj.5756 (PMC6211265; doi:10.7717/peerj.5756)
Supplement: Supplemental Information 2 [file peerj-06-5756-s002.zip › File definition.pdf]

DATASET NAME DataSet1 WINDOW=FRONT.  
 DISPLAY DICTIONARY.

## File Information

[DataSet1] C:\Users\sc318\AppData\Local\Microsoft\Windows\Temporary Internet Files\Content.Outlook\15LD69CX\AC\_database\_groups\_229.sav

### Variable Information

| Variable     | Position | Label                                                                                      | Measurement Level | Role  | Column Width | Alignment |
|--------------|----------|--------------------------------------------------------------------------------------------|-------------------|-------|--------------|-----------|
| ID_number    | 1        | ID: Participant ID                                                                         | Nominal           | Input | 22           | Left      |
| SH_question  | 2        | During the past week have you deliberately hurt yourself without meaning to kill yourself? | Nominal           | Input | 8            | Right     |
| Group        | 3        | Three groups in the design                                                                 | Nominal           | Input | 10           | Right     |
| LRFc_s       | 4        | RFQ certainty scale                                                                        | Nominal           | Input | 10           | Right     |
| LRFu_s       | 5        | RFQ uncertainty scale                                                                      | Nominal           | Input | 10           | Right     |
| Gender       | 6        | Gender                                                                                     | Nominal           | Input | 8            | Right     |
| Age          | 7        | age in years                                                                               | Scale             | Input | 5            | Right     |
| Relationship | 8        | Is the client in a relationship?                                                           | Nominal           | Input | 8            | Right     |
| Ethnicity    | 9        | Ethnicity                                                                                  | Nominal           | Input | 8            | Right     |
| EmpStat      | 10       | Employment status                                                                          | Nominal           | Input | 8            | Right     |
| EduAtt       | 11       | Educational attainment                                                                     | Nominal           | Input | 8            | Right     |
| Occupation   | 12       | occupation                                                                                 | Nominal           | Input | 8            | Right     |
| Pers_Therapy | 13       | Has the client received personal therapy?                                                  | Nominal           | Input | 8            | Right     |
| No_Pers_Ther | 14       | Number of months of personal therapy received                                              | Scale             | Input | 8            | Right     |

## Variable Information

| Variable     | Print Format | Write Format |
|--------------|--------------|--------------|
| ID_number    | A17          | A17          |
| SH_question  | F8           | F8           |
| Group        | F8           | F8           |
| LRFc_s       | F8.2         | F8.2         |
| LRFu_s       | F8.2         | F8.2         |
| Gender       | F8           | F8           |
| Age          | F8           | F8           |
| Relationship | F8           | F8           |
| Ethnicity    | F8           | F8           |
| EmpStat      | F8           | F8           |
| EduAtt       | F8           | F8           |
| Occupation   | F8           | F8           |
| Pers_Therapy | F8           | F8           |
| No_Pers_Ther | F8           | F8           |

### Variable Information

| Variable       | Position | Label                                 | Measurement Level | Role  | Column Width | Alignment |
|----------------|----------|---------------------------------------|-------------------|-------|--------------|-----------|
| SCOFF          | 15       | SCOFF                                 | Nominal           | Input | 10           | Right     |
| PTS            | 16       | Perspective taking subscale/Empathy   | Scale             | Input | 10           | Right     |
| KIMS           | 17       | Kentucky Mindfulness Inventory        | Scale             | Input | 10           | Right     |
| TAS            | 18       | Toronto Alexithymia Scale             | Scale             | Input | 10           | Right     |
| eyes           | 19       | Reading the Mind in the Eye           | Nominal           | Input | 10           | Right     |
| EatingDisorder | 20       | Eating disorder group with/without SH | Nominal           | Input | 16           | Right     |

### Variable Information

| Variable       | Print Format | Write Format |
|----------------|--------------|--------------|
| SCOFF          | F8.2         | F8.2         |
| PTS            | F8.2         | F8.2         |
| KIMS           | F8.2         | F8.2         |
| TAS            | F8.2         | F8.2         |
| eyes           | F8.2         | F8.2         |
| EatingDisorder | F8           | F8           |

Variables in the working file

## Variable Values

| Value        |    | Label                              |
|--------------|----|------------------------------------|
| SH_question  | 1  | yes                                |
|              | 2  | no                                 |
| Group        | 1  | Control                            |
|              | 2  | ED+SH                              |
|              | 3  | ED alone                           |
| Gender       | 1  | female                             |
|              | 2  | male                               |
| Relationship | 1  | yes                                |
|              | 2  | no                                 |
|              | 3  | not stated                         |
| Ethnicity    | 1  | white british                      |
|              | 2  | white irish                        |
|              | 3  | other white                        |
|              | 4  | mixed white and black caribbean    |
|              | 5  | mixed white and black african      |
|              | 6  | mixed white and asian              |
|              | 7  | any other mixed                    |
|              | 8  | asian indian                       |
|              | 9  | asian pakistani                    |
|              | 10 | asian bangladeshi                  |
|              | 11 | any other asian                    |
|              | 12 | black caribbean                    |
|              | 13 | black african                      |
|              | 14 | any other black                    |
|              | 15 | chinese                            |
|              | 16 | any other ethnic group             |
|              | 17 | not stated                         |
| EmpStat      | 1  | employed                           |
|              | 2  | self employed                      |
|              | 3  | unemployed                         |
|              | 4  | studying                           |
|              | 5  | retired                            |
|              | 6  | homemaker                          |
| EduAtt       | 1  | Secondary School to age 16         |
|              | 2  | Secondary school/college to age 18 |

## Variable Values

| Value          |   | Label                                           |
|----------------|---|-------------------------------------------------|
|                | 3 | Non-degree level vocational work-based training |
|                | 4 | University degree                               |
|                | 5 | University postgraduate studies (e.g. Masters)  |
|                | 6 | University doctoral level studies (e.g. PhD)    |
| Occupation     | 1 | Modern professional occupations                 |
|                | 2 | Clerical and intermediate occupations           |
|                | 3 | Senior managers or administrators               |
|                | 4 | Technical and craft                             |
|                | 5 | Semi-routine manual and service                 |
|                | 6 | Routine manual and service                      |
|                | 7 | Middle or junior managers                       |
|                | 8 | Traditional professional occupations            |
|                | 9 | not applicable                                  |
| Pers_Therapy   | 1 | yes                                             |
|                | 2 | no                                              |
|                | 3 | not stated                                      |
| EatingDisorder | 1 | Control                                         |
|                | 2 | ED both groups                                  |
